# Supplementary material for: Evaluation of main functional dyspepsia symptoms after probiotic administration in patients receiving conventional pharmacological therapies
Source: PubMed Central journal article supplement — J Int Med Res. 2021 Jan 20;49(1):0300060520982657. doi: 10.1177/0300060520982657 (PMC7829611; doi:10.1177/0300060520982657), 2021-01-20
Supplement: sj-pdf-2-imr-10.1177_0300060520982657.pdf [file sj-pdf-2-imr-10.1177_0300060520982657.pdf]

Supplemental table 1A

| <b>Group A</b>          |                                    |                                    |                |
|-------------------------|------------------------------------|------------------------------------|----------------|
| <b>Symptoms</b>         | <b>Presence of symptoms T0 (%)</b> | <b>Presence of symptoms T1 (%)</b> | <b>P-value</b> |
| Probiotic               |                                    |                                    |                |
| Post-prandial filling   | 85.4                               | 28.5                               | P<0.0001       |
| Early satiety           | 86.2                               | 30.4                               | P<0.0001       |
| Epigastric pain         | 65.7                               | 23                                 | P<0.0001       |
| Epigastric burning      | 61                                 | 16.3                               | P<0.0001       |
| Abdominal swelling      | 91.4                               | 30.8                               | P<0.0001       |
| Probiotic + PPI         |                                    |                                    |                |
| Post-prandial filling   | 88.2                               | 44.3                               | P<0.0001       |
| Early satiety           | 85.4                               | 36.7                               | P<0.0001       |
| Epigastric pain         | 80.5                               | 30.5                               | P<0.0001       |
| Epigastric burning      | 75.9                               | 33.6                               | P<0.0001       |
| Abdominal swelling      | 86.9                               | 33.6                               | P<0.0001       |
| Probiotic + Prokinetics |                                    |                                    |                |
| Post-prandial filling   | 96.3                               | 60.3                               | P<0.0001       |
| Early satiety           | 95.7                               | 52.7                               | P<0.0001       |
| Epigastric pain         | 66.4                               | 30.1                               | P<0.0001       |
| Epigastric burning      | 59.9                               | 28.8                               | P<0.0001       |
| Abdominal swelling      | 93                                 | 56.9                               | P<0.0001       |
| Probiotic + Antacids    |                                    |                                    |                |
| Post-prandial filling   | 91.6                               | 56.8                               | P<0.0001       |
| Early satiety           | 87.3                               | 40.2                               | P<0.0001       |
| Epigastric pain         | 75.4                               | 39.5                               | P<0.0001       |
| Epigastric burning      | 82.4                               | 45.3                               | P<0.0001       |
| Abdominal swelling      | 93.7                               | 55.6                               | P<0.0001       |

Supplemental table 1B

| <b>Group B</b>          |                                    |                                    |                |
|-------------------------|------------------------------------|------------------------------------|----------------|
| <b>Symptoms</b>         | <b>Presence of symptoms T0 (%)</b> | <b>Presence of symptoms T1 (%)</b> | <b>P-value</b> |
| Probiotic               |                                    |                                    |                |
| Post-prandial filling   | 67.3                               | 22.1                               | P<0.0001       |
| Early satiety           | 65.8                               | 19.1                               | P<0.0001       |
| Epigastric pain         | 85.9                               | 46.6                               | P<0.0001       |
| Epigastric burning      | 73.6                               | 34.4                               | P<0.0001       |
| Abdominal swelling      | 80.7                               | 28.3                               | P<0.0001       |
| Probiotic + PPI         |                                    |                                    |                |
| Post-prandial filling   | 69.7                               | 35.1                               | P<0.0001       |
| Early satiety           | 64.7                               | 28.7                               | P<0.0001       |
| Epigastric pain         | 94.8                               | 54.5                               | P<0.0001       |
| Epigastric burning      | 89                                 | 44.8                               | P<0.0001       |
| Abdominal swelling      | 77.5                               | 31                                 | P<0.0001       |
| Probiotic + Prokinetics |                                    |                                    |                |
| Post-prandial filling   | 86.2                               | 31                                 | P<0.0001       |
| Early satiety           | 79.6                               | 27.4                               | P<0.0001       |
| Epigastric pain         | 97.4                               | 53.5                               | P<0.0001       |
| Epigastric burning      | 86.9                               | 44.8                               | P<0.0001       |
| Abdominal swelling      | 94.1                               | 36.2                               | P<0.0001       |
| Probiotic + Antacids    |                                    |                                    |                |
| Post-prandial filling   | 70                                 | 36.5                               | P<0.0001       |
| Early satiety           | 63                                 | 28.6                               | P<0.0001       |
| Epigastric pain         | 94.8                               | 61.9                               | P<0.0001       |
| Epigastric burning      | 93.7                               | 41.3                               | P<0.0001       |
| Abdominal swelling      | 86.1                               | 34.9                               | P<0.0001       |
